# Supplementary material
Source: PubMed Central journal article supplement (PMC3490007)
Supplement: NIHMS413035-supplement-03.pdf [file NIHMS413035-supplement-03.pdf]

Table 1. Primers used in this study

|                                                                                           |                                                  |
|-------------------------------------------------------------------------------------------|--------------------------------------------------|
| TAAGCTAGAATGTATTGAATGTATTCATCTTCCTTACATCT<br>CTCTCTCTCTTCACACTTGTTACCCGGCGCGGCAGCGCT<br>C | <i>SEC61</i><br>knockout                         |
| GGGGTGTGGCTAAATGCGATTTTTTTTTCTTTGGATATT<br>ATTTTCATTTTATATTCAGCACTGAGCAGCGTAATC           | <i>SEC61</i><br><i>knockout</i>                  |
| AAATAGTACAGATTGGCGTGTATTGTCCATAACTCGTGTC<br>CATTGTCCGCGAATTCGAGCTCGTTTAAAC                | insertion of gal<br>promoter into<br><i>SSS1</i> |
| ACCTGGTTGTTGCTCTGCTTTTTCTCTTCACCTTTTTCACT<br>AGCTCTAGCCATTTTGAGATCCGGGTTTT                | insertion of gal<br>promoter into<br><i>SSS1</i> |
| CACGTCCATTATCACTTTTCTCCATATCACCCCTTCATACA<br>GAATTCGAGCTCGTTTAAAC                         | insertion of gal<br>promoter into<br><i>IRE1</i> |
| CGAGCAGTGTCAATACTAACATGTTTCTTCGAAGTAGACG<br>CATTTTGAGATCCGGGTTTT                          | insertion of gal<br>promoter into<br><i>IRE1</i> |
| TTGGCAGACCCACTCTGCGACGATA                                                                 | <i>HAC1</i><br>amplification                     |
| GACTGCGCTTCTGGATTACG                                                                      | <i>HAC1</i><br>amplification                     |
| TCGAACAAGAAATGCAAACCG                                                                     | beta actin<br>amplification                      |
| GGCAGATTCCAAACCCAAAAC                                                                     | beta actin<br>amplification                      |
